# Supplementary material
Source: PubMed Central journal article supplement (PMC2991082)

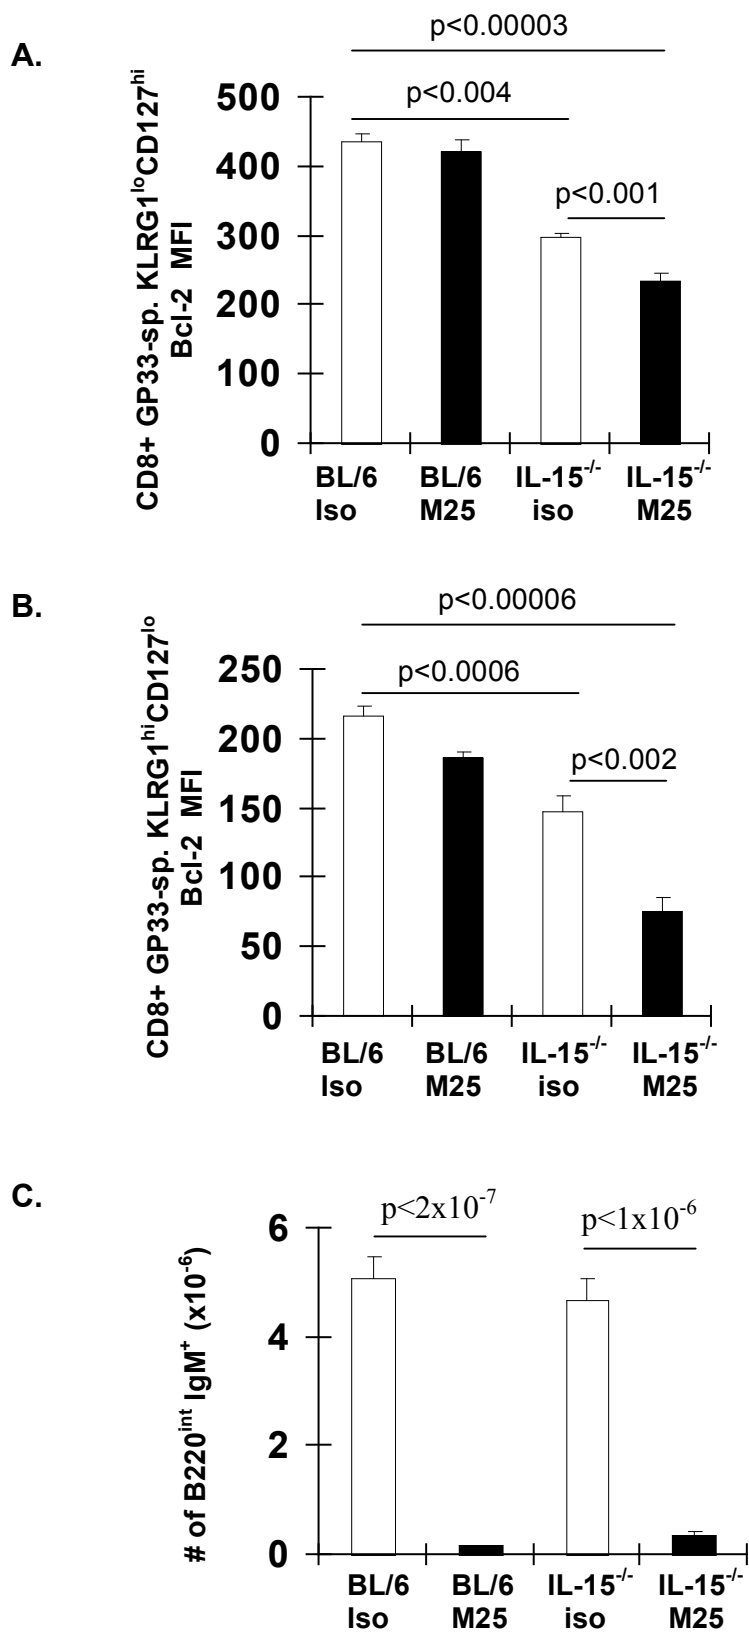

Supplement: NIHMS248429-supplement-S1.pdf [file NIHMS248429-supplement-S1.pdf]

A.

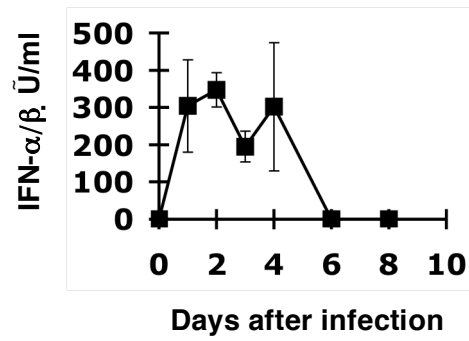

B.

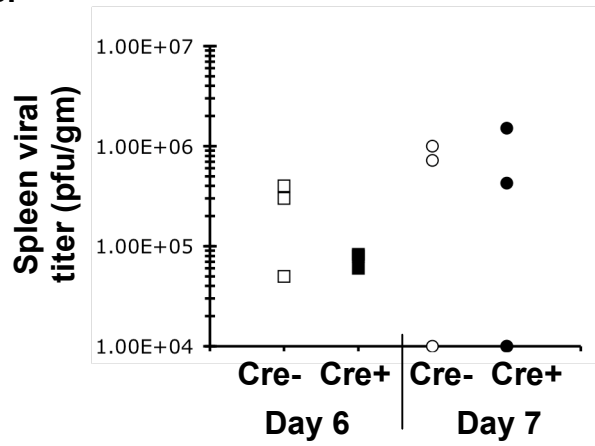

Supplement: NIHMS248429-supplement-S2.pdf [file NIHMS248429-supplement-S2.pdf]

**A.**

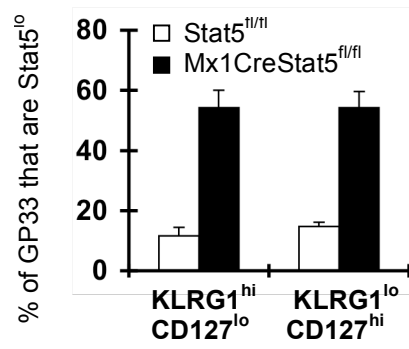

**B.**

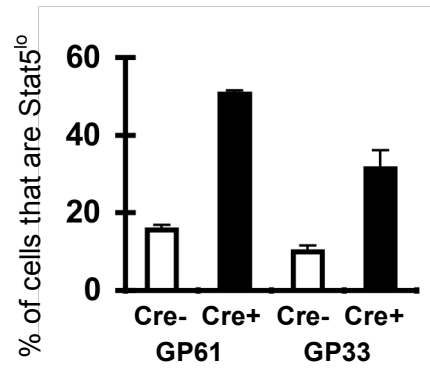

**C.**

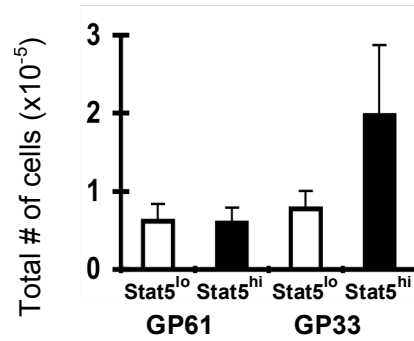

Supplement: NIHMS248429-supplement-S3.pdf [file NIHMS248429-supplement-S3.pdf]

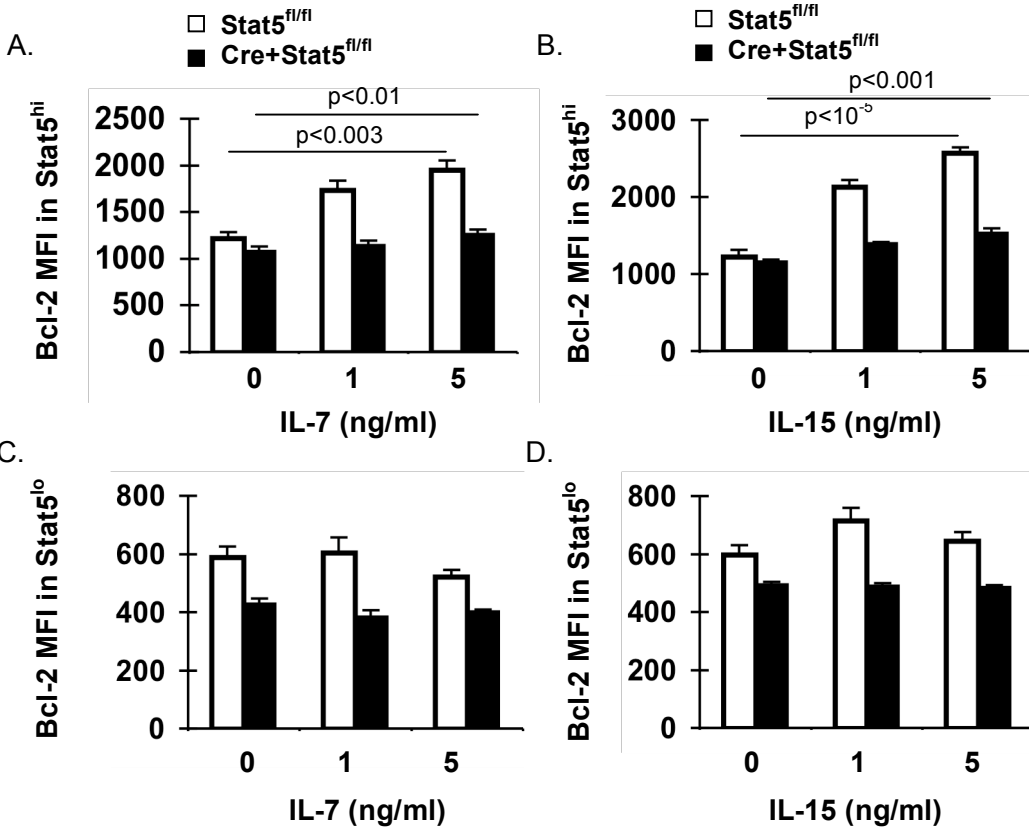

Supplement: NIHMS248429-supplement-S4.pdf [file NIHMS248429-supplement-S4.pdf]
